# Supplementary material for: Chapare Virus, a Newly Discovered Arenavirus Isolated from a Fatal Hemorrhagic Fever Case in Bolivia
Source: PLOS journal article supplement (doi:10.1371/journal.ppat.1000047), 2008-04-17
Supplement: S1 (10.1371/journal.ppat.1000047.s001) [file journal.ppat.1000047.s001]

Amino acid distances for complete L and Z genes of the new world arenaviruses\*

|                   | 1  | 2  | 3  | 4  | 5  | 6  | 7   | 8   | 9   | 10  | 11  | 12  | 13  | 14  | 15  | 16  | 17  | 18  | 19  | 20  | 21  | 22  | 23  | 24  | 25  | 26  | 27  | 28  | 29  | 30  | 31  | 32  | 33  | 34  | 35  | 36  | 37  | 38  | 39  | 40  | 41  | 42  | 43  | 44  | 45  |     |     |
|-------------------|----|----|----|----|----|----|-----|-----|-----|-----|-----|-----|-----|-----|-----|-----|-----|-----|-----|-----|-----|-----|-----|-----|-----|-----|-----|-----|-----|-----|-----|-----|-----|-----|-----|-----|-----|-----|-----|-----|-----|-----|-----|-----|-----|-----|-----|
| 1 ALL_CLHP2472    | —  | 56 | 43 | 44 | 55 | 56 | n/a | n/a | n/a | n/a | n/a | n/a | n/a | n/a | n/a | n/a | n/a | n/a | 56  | 56  | 56  | 56  | 56  | n/a | 55  | 55  | n/a | n/a | n/a | n/a | n/a | n/a | n/a | n/a | 56  | 54  | 36  | n/a | n/a | n/a | n/a | 34  | 56  | 55  | 42  | 43  |     |
| 2 AMA_BeAn70563   | 54 | —  | 56 | 56 | 39 | 31 | n/a | n/a | n/a | n/a | n/a | n/a | n/a | n/a | n/a | n/a | n/a | n/a | 28  | 39  | 39  | 39  | 39  | n/a | 38  | 38  | n/a | n/a | n/a | n/a | n/a | n/a | n/a | 38  | 49  | 55  | n/a | n/a | n/a | n/a | 55  | 39  | 40  | 56  | 56  |     |     |
| 3 BCN_A0060209    | 31 | 54 | —  | 2  | 56 | 55 | n/a | n/a | n/a | n/a | n/a | n/a | n/a | n/a | n/a | n/a | n/a | n/a | 55  | 56  | 56  | 56  | 56  | n/a | 56  | 55  | n/a | n/a | n/a | n/a | n/a | n/a | n/a | 56  | 55  | 45  | n/a | n/a | n/a | n/a | 43  | 56  | 57  | 28  | 27  |     |     |
| 4 BCN_AVA0070039  | 31 | 54 | 0  | —  | 56 | 55 | n/a | n/a | n/a | n/a | n/a | n/a | n/a | n/a | n/a | n/a | n/a | n/a | 56  | 56  | 56  | 56  | 56  | n/a | 56  | 55  | n/a | n/a | n/a | n/a | n/a | n/a | n/a | 55  | 54  | 46  | n/a | n/a | n/a | n/a | 43  | 55  | 57  | 28  | 27  |     |     |
| 5 CHA_810419      | 59 | 41 | 55 | 55 | —  | 41 | n/a | n/a | n/a | n/a | n/a | n/a | n/a | n/a | n/a | n/a | n/a | n/a | 40  | 38  | 38  | 38  | 38  | n/a | 37  | 38  | n/a | n/a | n/a | n/a | n/a | n/a | n/a | 38  | 49  | 55  | n/a | n/a | n/a | n/a | 55  | 26  | 38  | 56  | 56  |     |     |
| 6 CPX_BeAn119303  | 58 | 29 | 56 | 56 | 39 | —  | n/a | n/a | n/a | n/a | n/a | n/a | n/a | n/a | n/a | n/a | n/a | n/a | 31  | 40  | 40  | 40  | 40  | n/a | 39  | 39  | n/a | n/a | n/a | n/a | n/a | n/a | n/a | 39  | 50  | 56  | n/a | n/a | n/a | n/a | 56  | 41  | 40  | 56  | 55  |     |     |
| 7 GTO_VHF1608     | 55 | 32 | 52 | 52 | 38 | 28 | —   | n/a | n/a | n/a | n/a | n/a | n/a | n/a | n/a | n/a | n/a | n/a | n/a | n/a | n/a | n/a | n/a | n/a | n/a | n/a | n/a | n/a | n/a | n/a | n/a | n/a | n/a | n/a | n/a | n/a | n/a | n/a | n/a | n/a | n/a | n/a | n/a | n/a | n/a | n/a |     |
| 8 GTO_AV97021119  | 55 | 28 | 52 | 52 | 35 | 26 | 9   | —   | n/a | n/a | n/a | n/a | n/a | n/a | n/a | n/a | n/a | n/a | n/a | n/a | n/a | n/a | n/a | n/a | n/a | n/a | n/a | n/a | n/a | n/a | n/a | n/a | n/a | n/a | n/a | n/a | n/a | n/a | n/a | n/a | n/a | n/a | n/a | n/a | n/a | n/a |     |
| 9 GTO_VHF1750     | 56 | 32 | 53 | 53 | 39 | 26 | 6   | 7   | —   | n/a | n/a | n/a | n/a | n/a | n/a | n/a | n/a | n/a | n/a | n/a | n/a | n/a | n/a | n/a | n/a | n/a | n/a | n/a | n/a | n/a | n/a | n/a | n/a | n/a | n/a | n/a | n/a | n/a | n/a | n/a | n/a | n/a | n/a | n/a | n/a | n/a |     |
| 10 GTO_VHF3990    | 54 | 31 | 52 | 52 | 36 | 29 | 11  | 8   | 9   | —   | n/a | n/a | n/a | n/a | n/a | n/a | n/a | n/a | n/a | n/a | n/a | n/a | n/a | n/a | n/a | n/a | n/a | n/a | n/a | n/a | n/a | n/a | n/a | n/a | n/a | n/a | n/a | n/a | n/a | n/a | n/a | n/a | n/a | n/a | n/a | n/a | n/a |
| 11 GTO_S56764     | 55 | 28 | 52 | 52 | 35 | 26 | 8   | 1   | 6   | 7   | —   | n/a | n/a | n/a | n/a | n/a | n/a | n/a | n/a | n/a | n/a | n/a | n/a | n/a | n/a | n/a | n/a | n/a | n/a | n/a | n/a | n/a | n/a | n/a | n/a | n/a | n/a | n/a | n/a | n/a | n/a | n/a | n/a | n/a | n/a | n/a | n/a |
| 12 GTO_CVH961104  | 55 | 29 | 52 | 52 | 36 | 27 | 6   | 4   | 5   | 5   | 2   | —   | n/a | n/a | n/a | n/a | n/a | n/a | n/a | n/a | n/a | n/a | n/a | n/a | n/a | n/a | n/a | n/a | n/a | n/a | n/a | n/a | n/a | n/a | n/a | n/a | n/a | n/a | n/a | n/a | n/a | n/a | n/a | n/a | n/a | n/a | n/a |
| 13 GTO_CVH950801  | 55 | 31 | 52 | 52 | 36 | 28 | 7   | 5   | 6   | 6   | 4   | 1   | —   | n/a | n/a | n/a | n/a | n/a | n/a | n/a | n/a | n/a | n/a | n/a | n/a | n/a | n/a | n/a | n/a | n/a | n/a | n/a | n/a | n/a | n/a | n/a | n/a | n/a | n/a | n/a | n/a | n/a | n/a | n/a | n/a | n/a | n/a |
| 14 GTO_CVH960102  | 55 | 31 | 52 | 52 | 36 | 28 | 7   | 5   | 6   | 6   | 4   | 1   | 0   | —   | n/a | n/a | n/a | n/a | n/a | n/a | n/a | n/a | n/a | n/a | n/a | n/a | n/a | n/a | n/a | n/a | n/a | n/a | n/a | n/a | n/a | n/a | n/a | n/a | n/a | n/a | n/a | n/a | n/a | n/a | n/a | n/a | n/a |
| 15 GTO_CVH960103  | 55 | 32 | 52 | 52 | 38 | 28 | 7   | 6   | 6   | 7   | 5   | 2   | 1   | —   | n/a | n/a | n/a | n/a | n/a | n/a | n/a | n/a | n/a | n/a | n/a | n/a | n/a | n/a | n/a | n/a | n/a | n/a | n/a | n/a | n/a | n/a | n/a | n/a | n/a | n/a | n/a | n/a | n/a | n/a | n/a | n/a | n/a |
| 16 GTO_CVH960302  | 55 | 32 | 52 | 52 | 38 | 28 | 7   | 6   | 6   | 7   | 5   | 2   | 1   | 1   | 0   | —   | n/a | n/a | n/a | n/a | n/a | n/a | n/a | n/a | n/a | n/a | n/a | n/a | n/a | n/a | n/a | n/a | n/a | n/a | n/a | n/a | n/a | n/a | n/a | n/a | n/a | n/a | n/a | n/a | n/a | n/a | n/a |
| 17 GTO_CVH960101  | 55 | 31 | 52 | 52 | 36 | 28 | 7   | 5   | 6   | 6   | 4   | 1   | 0   | 0   | 1   | 1   | —   | n/a | n/a | n/a | n/a | n/a | n/a | n/a | n/a | n/a | n/a | n/a | n/a | n/a | n/a | n/a | n/a | n/a | n/a | n/a | n/a | n/a | n/a | n/a | n/a | n/a | n/a | n/a | n/a | n/a | n/a |
| 18 GTO_INH95551   | 55 | 31 | 52 | 52 | 38 | 29 | 7   | 6   | 6   | 7   | 5   | 2   | 1   | 1   | 2   | 2   | 1   | —   | 39  | 39  | 39  | 39  | 39  | n/a | 38  | 38  | n/a | n/a | n/a | n/a | n/a | n/a | n/a | 38  | 50  | 56  | n/a | n/a | n/a | n/a | 55  | 39  | 40  | 55  | 55  |     |     |
| 19 JUN_MC2        | 56 | 33 | 58 | 58 | 40 | 28 | 32  | 29  | 31  | 33  | 29  | 31  | 31  | 31  | 31  | 31  | 31  | 29  | —   | 0   | 2   | 2   | 2   | n/a | 25  | 25  | n/a | n/a | n/a | n/a | n/a | n/a | n/a | 25  | 50  | 56  | n/a | n/a | n/a | n/a | 54  | 38  | 29  | 56  | 56  |     |     |
| 20 JUN_Rumero     | 56 | 33 | 58 | 58 | 40 | 28 | 32  | 29  | 31  | 33  | 29  | 31  | 31  | 31  | 31  | 31  | 29  | 0   | —   | 2   | 2   | 2   | 2   | n/a | 25  | 25  | n/a | n/a | n/a | n/a | n/a | n/a | 25  | 50  | 56  | n/a | n/a | n/a | n/a | 54  | 38  | 29  | 56  | 56  |     |     |     |
| 21 JUN_Candid1    | 56 | 33 | 58 | 58 | 40 | 29 | 33  | 31  | 32  | 34  | 31  | 32  | 32  | 32  | 32  | 32  | 31  | 1   | 1   | —   | 0   | 0   | n/a | 25  | 25  | n/a | n/a | n/a | n/a | n/a | n/a | n/a | 25  | 50  | 56  | n/a | n/a | n/a | n/a | 54  | 39  | 29  | 56  | 56  |     |     |     |
| 22 JUN_XJ44       | 56 | 33 | 58 | 58 | 40 | 29 | 33  | 31  | 32  | 34  | 31  | 32  | 32  | 32  | 32  | 32  | 31  | 1   | 1   | 0   | —   | 0   | n/a | 25  | 25  | n/a | n/a | n/a | n/a | n/a | n/a | n/a | 25  | 50  | 56  | n/a | n/a | n/a | n/a | 54  | 39  | 29  | 56  | 56  |     |     |     |
| 23 JUN_XJ13       | 56 | 33 | 58 | 58 | 40 | 29 | 33  | 31  | 32  | 34  | 31  | 32  | 32  | 32  | 32  | 32  | 31  | 1   | 1   | 0   | 0   | —   | n/a | 25  | 25  | n/a | n/a | n/a | n/a | n/a | n/a | n/a | 25  | 50  | 56  | n/a | n/a | n/a | n/a | 54  | 38  | 28  | 56  | 56  |     |     |     |
| 24 LAT_MARU10924  | 56 | 49 | 56 | 56 | 46 | 48 | 48  | 49  | 49  | 48  | 49  | 48  | 48  | 48  | 48  | 48  | 48  | 49  | 49  | 49  | 49  | 49  | —   | n/a | n/a | n/a | n/a | n/a | n/a | n/a | n/a | n/a | n/a | n/a | n/a | n/a | n/a | n/a | n/a | n/a | n/a | n/a | n/a | n/a | n/a | n/a |     |
| 25 MAC_Mallele    | 54 | 31 | 56 | 56 | 36 | 29 | 34  | 31  | 33  | 32  | 31  | 32  | 32  | 32  | 32  | 32  | 33  | 20  | 20  | 20  | 20  | 20  | 49  | —   | 5   | n/a | n/a | n/a | n/a | n/a | n/a | n/a | 4   | 49  | 56  | n/a | n/a | n/a | n/a | 55  | 37  | 28  | 55  | 56  |     |     |     |
| 26 MAC_Chicava    | 56 | 32 | 58 | 58 | 38 | 29 | 33  | 29  | 32  | 33  | 29  | 31  | 31  | 31  | 31  | 31  | 32  | 19  | 19  | 19  | 19  | 19  | 49  | 4   | —   | n/a | n/a | n/a | n/a | n/a | n/a | 2   | 49  | 56  | n/a | n/a | n/a | n/a | 54  | 37  | 27  | 55  | 56  |     |     |     |     |
| 27 MAC_9430084    | 55 | 32 | 56 | 56 | 38 | 29 | 32  | 29  | 32  | 32  | 29  | 29  | 29  | 29  | 29  | 29  | 31  | 18  | 18  | 18  | 18  | 18  | 51  | 6   | 6   | —   | n/a | n/a | n/a | n/a | n/a | n/a | n/a | n/a | n/a | n/a | n/a | n/a | n/a | n/a | n/a | n/a | n/a | n/a | n/a | n/a |     |
| 28 MAC_200002427  | 55 | 31 | 56 | 56 | 36 | 29 | 33  | 29  | 32  | 33  | 29  | 31  | 31  | 31  | 31  | 31  | 32  | 19  | 19  | 19  | 19  | 19  | 49  | 4   | 4   | 2   | —   | n/a | n/a | n/a | n/a | n/a | n/a | n/a | n/a | n/a | n/a | n/a | n/a | n/a | n/a | n/a | n/a | n/a | n/a | n/a |     |
| 29 MAC_9301012    | 56 | 32 | 58 | 58 | 38 | 29 | 33  | 29  | 32  | 33  | 29  | 31  | 31  | 31  | 31  | 31  | 32  | 19  | 19  | 19  | 19  | 19  | 49  | 4   | 0   | 6   | 4   | —   | n/a | n/a | n/a | n/a | n/a | n/a | n/a | n/a | n/a | n/a | n/a | n/a | n/a | n/a | n/a | n/a | n/a | n/a |     |
| 30 MAC_MARU216606 | 55 | 31 | 56 | 56 | 38 | 29 | 33  | 29  | 32  | 33  | 29  | 31  | 31  | 31  | 31  | 31  | 32  | 19  | 19  | 19  | 19  | 19  | 49  | 2   | 1   | 5   | 2   | 1   | —   | n/a | n/a | n/a | n/a | n/a | n/a | n/a | n/a | n/a | n/a | n/a | n/a | n/a | n/a | n/a | n/a | n/a |     |
| 31 MAC_MARU222688 | 55 | 31 | 56 | 56 | 36 | 29 | 33  | 29  | 32  | 33  | 29  | 31  | 31  | 31  | 31  | 31  | 32  | 19  | 19  | 19  | 19  | 19  | 49  | 4   | 4   | 2   | 0   | 4   | 2   | —   | n/a | n/a | n/a | n/a | n/a | n/a | n/a | n/a | n/a | n/a | n/a | n/a | n/a | n/a | n/a | n/a |     |
| 32 MAC_MARU249121 | 55 | 31 | 56 | 56 | 36 | 29 | 33  | 29  | 32  | 33  | 29  | 31  | 31  | 31  | 31  | 31  | 32  | 19  | 19  | 19  | 19  | 19  | 49  | 4   | 4   | 2   | 0   | 4   | 2   | 0   | —   | n/a | n/a | n/a | n/a | n/a | n/a | n/a | n/a | n/a | n/a | n/a | n/a | n/a | n/a | n/a |     |
| 33 MAC_9530537    | 55 | 31 | 56 | 56 | 38 | 29 | 33  | 29  | 32  | 33  | 29  | 31  | 31  | 31  | 31  | 31  | 32  | 19  | 19  | 19  | 19  | 19  | 51  | 4   | 4   | 5   | 2   | 4   | 2   | 2   | —   | n/a | n/a | n/a | n/a | n/a | n/a | n/a | n/a | n/a | n/a | n/a | n/a | n/a | n/a | n/a |     |
| 34 MAC_Carvalho   | 55 | 31 | 56 | 56 | 38 | 29 | 33  | 29  | 32  | 33  | 29  | 31  | 31  | 31  | 31  | 31  | 32  | 19  | 19  | 19  | 19  | 19  | 49  | 2   | 1   | 5   | 2   | 1   | 0   | 2   | 2   | 2   | —   | 49  | 56  | n/a | n/a | n/a | n/a | n/a | 55  | 37  | 27  | 55  | 56  |     |     |
| 35 OLI_3229       | 52 | 45 | 53 | 53 | 46 | 46 | 51  | 46  | 51  | 47  | 46  | 48  | 48  | 48  | 49  | 49  | 48  | 48  | 48  | 48  | 48  | 48  | 22  | 47  | 46  | 48  | 47  | 46  | 46  | 47  | 47  | 48  | 46  | —   | 54  | n/a | n/a | n/a | n/a | 53  | 50  | 50  | 55  | 55  |     |     |     |
| 36 PIC_AN3739     | 20 | 58 | 35 | 35 | 59 | 60 | 54  | 55  | 56  | 54  | 55  | 54  | 54  | 54  | 54  | 54  | 60  | 60  | 60  | 60  | 60  | 60  | 55  | 58  | 59  | 56  | 58  | 59  | 58  | 58  | 58  | 58  | 53  | —   | n/a | n/a | n/a | n/a | 38  | 56  | 57  | 45  | 45  |     |     |     |     |
| 37 PIR_1743       | 16 | 53 | 32 | 32 | 59 | 55 | 53  | 53  | 54  | 53  | 53  | 53  | 53  | 53  | 53  | 53  | 56  | 56  | 56  | 56  | 56  | 59  | 54  | 55  | 54  | 54  | 55  | 54  | 54  | 54  | 54  | 54  | 26  | —   | n/a | n/a | n/a | n/a | n/a | n/a | n/a | n/a | n/a | n/a | n/a |     |     |
| 38 PIR_3945       | 22 | 53 | 32 | 32 | 58 | 54 | 53  | 53  | 54  | 53  | 53  | 53  | 53  | 53  | 53  | 53  | 56  | 56  | 56  | 56  | 56  | 58  | 53  | 54  | 53  | 53  | 54  | 53  | 53  | 53  | 53  | 53  | 26  | 8   | —   | n/a | n/a | n/a | n/a | n/a | n/a | n/a | n/a | n/a | n/a |     |     |
| 39 PIR_1645       | 16 | 54 | 33 | 33 | 59 | 54 | 54  | 54  | 53  |     |     |     |     |     |     |     |     |     |     |     |     |     |     |     |     |     |     |     |     |     |     |     |     |     |     |     |     |     |     |     |     |     |     |     |     |     |     |

**Amino acid distances for complete nucleocapsid and glycoprotein genes of the new world arenaviruses\***

|                   | 1  | 2  | 3  | 4  | 5  | 6  | 7  | 8  | 9  | 10 | 11 | 12 | 13 | 14 | 15 | 16 | 17 | 18 | 19 | 20   | 21  | 22  | 23  | 24  | 25  | 26  | 27  | 28  | 29  | 30  | 31  | 32  | 33  | 34  | 35  | 36  | 37  | 38  | 39  | 40  | 41  | 42  |     |
|-------------------|----|----|----|----|----|----|----|----|----|----|----|----|----|----|----|----|----|----|----|------|-----|-----|-----|-----|-----|-----|-----|-----|-----|-----|-----|-----|-----|-----|-----|-----|-----|-----|-----|-----|-----|-----|-----|
| 1 ALL_Peru        | —  | 2  | 42 | 35 | 35 | 35 | 41 | 42 | 38 | 38 | 26 | 26 | 42 | 42 | 42 | 42 | 43 | 42 | 42 | n/a‡ | n/a | 41  | 40  | 41  | 41  | 40  | 41  | 41  | 41  | 41  | 41  | 41  | 41  | 28  | 23  | 23  | 30  | 43  | 40  | 42  | 37  | 36  |     |
| 2 ALL_CLHP2098    | 2  | —  | 30 | 35 | 35 | 35 | 41 | 42 | 38 | 38 | 25 | 25 | 42 | 42 | 42 | 42 | 43 | 42 | 42 | n/a  | n/a | 41  | 40  | 41  | 41  | 40  | 41  | 41  | 41  | 41  | 41  | 28  | 23  | 23  | 30  | 43  | 40  | 42  | 36  | 36  |     |     |     |
| 3 AMA_BeAn70563   | 59 | 59 | —  | 45 | 45 | 44 | 27 | 17 | 46 | 46 | 42 | 42 | 14 | 14 | 25 | 26 | 27 | 25 | 26 | n/a  | n/a | 37  | 25  | 26  | 26  | 25  | 26  | 25  | 25  | 25  | 25  | 25  | 25  | 25  | 37  | 42  | 42  | 43  | 27  | 29  | 49  | 44  | 44  |
| 4 BCN_A0060209    | 58 | 58 | 50 | —  | 1  | 1  | 43 | 46 | 18 | 17 | 35 | 35 | 44 | 44 | 46 | 46 | 46 | 46 | 46 | n/a  | n/a | 42  | 45  | 45  | 45  | 45  | 45  | 45  | 45  | 45  | 45  | 45  | 43  | 35  | 36  | 36  | 36  | 36  | 45  | 46  | 25  | 18  | 17  |
| 5 BCN_98470029    | 57 | 58 | 50 | 2  | —  | 0  | 43 | 46 | 17 | 17 | 35 | 35 | 44 | 44 | 46 | 46 | 46 | 46 | 46 | n/a  | n/a | 42  | 45  | 45  | 45  | 45  | 45  | 45  | 45  | 45  | 45  | 43  | 35  | 36  | 35  | 36  | 44  | 45  | 25  | 18  | 17  |     |     |
| 6 BCN_A0070039    | 58 | 58 | 50 | 2  | 2  | —  | 43 | 46 | 17 | 17 | 34 | 34 | 44 | 44 | 45 | 45 | 46 | 45 | 45 | n/a  | n/a | 42  | 45  | 45  | 45  | 45  | 45  | 45  | 45  | 45  | 45  | 43  | 34  | 36  | 35  | 36  | 44  | 45  | 24  | 18  | 17  |     |     |
| 7 CHA_810419      | 53 | 53 | 44 | 46 | 47 | 47 | —  | 28 | 43 | 43 | 41 | 41 | 27 | 27 | 29 | 29 | 30 | 29 | 29 | n/a  | n/a | 38  | 28  | 28  | 28  | 28  | 28  | 28  | 28  | 28  | 28  | 28  | 38  | 41  | 41  | 41  | 41  | 15  | 30  | 47  | 43  | 43  |     |
| 8 CPX_BeAn119303  | 58 | 58 | 30 | 45 | 45 | 45 | 42 | —  | 46 | 46 | 44 | 44 | 17 | 16 | 25 | 26 | 27 | 26 | 26 | n/a  | n/a | 35  | 25  | 24  | 25  | 25  | 25  | 25  | 25  | 25  | 25  | 25  | 25  | 36  | 43  | 44  | 44  | 44  | 28  | 30  | 49  | 46  | 45  |
| 9 CTN_AVA0400135  | 55 | 55 | 52 | 34 | 34 | 34 | 45 | 47 | —  | 2  | 35 | 35 | 44 | 44 | 45 | 46 | 46 | 46 | 46 | n/a  | n/a | 42  | 45  | 45  | 45  | 45  | 45  | 45  | 45  | 45  | 45  | 44  | 38  | 36  | 36  | 37  | 44  | 46  | 22  | 13  | 13  |     |     |
| 10 CTN_AVA0400212 | 55 | 55 | 53 | 34 | 34 | 34 | 46 | 48 | 5  | —  | 35 | 35 | 44 | 44 | 45 | 46 | 46 | 46 | 46 | n/a  | n/a | 43  | 45  | 45  | 45  | 45  | 45  | 45  | 45  | 45  | 45  | 44  | 38  | 36  | 36  | 37  | 44  | 46  | 22  | 13  | 13  |     |     |
| 11 FLE_Pinheiro   | 17 | 15 | 57 | 56 | 56 | 56 | 52 | 56 | 56 | 57 | —  | 0  | 41 | 41 | 42 | 41 | 42 | 41 | 41 | n/a  | n/a | 43  | 42  | 43  | 42  | 42  | 42  | 42  | 42  | 42  | 21  | 30  | 30  | 32  | 43  | 43  | 41  | 37  | 37  |     |     |     |     |
| 12 FLE_BeAn293022 | 17 | 15 | 57 | 56 | 56 | 56 | 52 | 56 | 56 | 57 | 0  | —  | 41 | 41 | 42 | 41 | 42 | 41 | 41 | n/a  | n/a | 43  | 42  | 43  | 42  | 42  | 42  | 42  | 42  | 42  | 21  | 30  | 30  | 32  | 43  | 43  | 41  | 37  | 37  |     |     |     |     |
| 13 GTO_CVH960101  | 58 | 58 | 29 | 47 | 48 | 48 | 41 | 30 | 51 | 51 | 55 | 55 | —  | 0  | 24 | 25 | 26 | 25 | 25 | n/a  | n/a | 36  | 23  | 23  | 23  | 23  | 23  | 23  | 22  | 23  | 23  | 37  | 41  | 42  | 42  | 41  | 29  | 28  | 48  | 44  | 44  |     |     |
| 14 GTO_INH95551   | 57 | 57 | 29 | 47 | 48 | 48 | 41 | 29 | 50 | 50 | 55 | 55 | 1  | —  | 24 | 25 | 26 | 25 | 25 | n/a  | n/a | 36  | 23  | 23  | 23  | 23  | 23  | 23  | 22  | 23  | 23  | 37  | 41  | 42  | 42  | 41  | 29  | 28  | 48  | 44  | 44  |     |     |
| 15 JUN_Rumero     | 59 | 58 | 43 | 47 | 48 | 48 | 42 | 45 | 49 | 49 | 56 | 56 | 42 | 42 | —  | 1  | 4  | 3  | 1  | n/a  | n/a | 38  | 12  | 12  | 12  | 11  | 12  | 12  | 11  | 11  | 12  | 39  | 42  | 44  | 44  | 43  | 29  | 20  | 48  | 44  | 44  |     |     |
| 16 JUN_Candid1    | 59 | 59 | 44 | 47 | 48 | 49 | 43 | 46 | 49 | 49 | 57 | 57 | 42 | 43 | 2  | —  | 4  | 3  | 0  | n/a  | n/a | 39  | 12  | 12  | 12  | 11  | 12  | 12  | 11  | 11  | 12  | 39  | 42  | 43  | 43  | 43  | 29  | 20  | 48  | 44  | 44  |     |     |
| 17 JUN_MC2        | 59 | 58 | 43 | 47 | 48 | 48 | 42 | 45 | 49 | 49 | 56 | 56 | 42 | 43 | 1  | 2  | —  | 3  | 4  | n/a  | n/a | 39  | 13  | 14  | 14  | 13  | 13  | 14  | 13  | 13  | 40  | 42  | 45  | 44  | 43  | 30  | 21  | 49  | 46  | 46  |     |     |     |
| 18 JUN_cbaIV4454  | 59 | 58 | 44 | 47 | 48 | 48 | 42 | 46 | 49 | 49 | 56 | 56 | 42 | 43 | 1  | 2  | 2  | —  | 3  | n/a  | n/a | 38  | 12  | 12  | 12  | 11  | 12  | 12  | 11  | 11  | 12  | 38  | 41  | 44  | 44  | 43  | 29  | 20  | 48  | 44  | 44  |     |     |
| 19 JUN_XJ13       | 59 | 58 | 43 | 47 | 48 | 48 | 42 | 45 | 48 | 49 | 56 | 56 | 42 | 42 | 1  | 1  | 1  | 2  | —  | n/a  | n/a | 39  | 12  | 12  | 12  | 11  | 12  | 12  | 11  | 11  | 12  | 39  | 42  | 43  | 43  | 43  | 29  | 20  | 48  | 44  | 44  |     |     |
| 20 JUN_XJ         | 59 | 58 | 43 | 47 | 48 | 48 | 42 | 45 | 49 | 49 | 56 | 56 | 42 | 43 | 1  | 2  | 0  | 2  | 1  | —    | n/a | n/a | n/a | n/a | n/a | n/a | n/a | n/a | n/a | n/a | n/a | n/a | n/a | n/a | n/a | n/a | n/a | n/a | n/a | n/a | n/a | n/a | n/a |
| 21 JUN_XJ44       | 59 | 58 | 43 | 47 | 48 | 48 | 42 | 45 | 49 | 49 | 56 | 56 | 42 | 43 | 1  | 2  | 0  | 2  | 1  | —    | n/a | n/a | n/a | n/a | n/a | n/a | n/a | n/a | n/a | n/a | n/a | n/a | n/a | n/a | n/a | n/a | n/a | n/a | n/a | n/a | n/a | n/a | n/a |
| 22 LAT_MARU10924  | 47 | 47 | 54 | 53 | 53 | 53 | 49 | 50 | 54 | 55 | 45 | 45 | 50 | 50 | 54 | 54 | 54 | 53 | 54 | 54   | —   | 37  | 37  | 37  | 37  | 37  | 37  | 37  | 37  | 37  | 19  | 41  | 42  | 42  | 40  | 37  | 39  | 45  | 42  | 41  |     |     |     |
| 23 MAC_9530537    | 59 | 59 | 43 | 48 | 48 | 48 | 43 | 45 | 49 | 50 | 58 | 58 | 43 | 43 | 25 | 26 | 26 | 25 | 25 | 26   | 26  | 52  | —   | 2   | 2   | 2   | 3   | 2   | 1   | 2   | 2   | 1   | 37  | 42  | 43  | 44  | 43  | 28  | 19  | 48  | 44  | 43  |     |
| 24 MAC_Mallele    | 58 | 58 | 44 | 49 | 49 | 49 | 43 | 45 | 48 | 49 | 56 | 56 | 43 | 43 | 26 | 27 | 26 | 26 | 26 | 26   | 26  | 52  | 5   | —   | 2   | 1   | 2   | 2   | 1   | 2   | 1   | 1   | 38  | 43  | 43  | 44  | 43  | 28  | 19  | 48  | 43  | 43  |     |
| 25 MAC_Chicava    | 58 | 58 | 44 | 48 | 48 | 48 | 43 | 45 | 49 | 49 | 56 | 56 | 44 | 44 | 26 | 27 | 26 | 26 | 26 | 26   | 26  | 52  | 5   | 4   | —   | 2   | 3   | 0   | 1   | 2   | 2   | 1   | 37  | 43  | 43  | 44  | 43  | 28  | 19  | 48  | 44  | 44  |     |
| 26 MAC_9430084    | 58 | 58 | 43 | 48 | 48 | 48 | 43 | 45 | 49 | 50 | 56 | 56 | 43 | 44 | 26 | 27 | 26 | 25 | 26 | 26   | 26  | 52  | 3   | 3   | 3   | —   | 1   | 1   | 1   | 1   | 1   | 38  | 43  | 43  | 44  | 43  | 27  | 19  | 48  | 44  | 44  |     |     |
| 27 MAC_200002427  | 58 | 58 | 44 | 48 | 48 | 48 | 44 | 45 | 48 | 49 | 56 | 56 | 43 | 44 | 26 | 27 | 26 | 26 | 26 | 26   | 26  | 52  | 5   | 4   | 4   | 3   | —   | 2   | 2   | 1   | 1   | 2   | 38  | 43  | 43  | 44  | 43  | 28  | 20  | 48  | 44  | 44  |     |
| 28 MAC_9301012    | 58 | 58 | 44 | 48 | 48 | 48 | 43 | 46 | 49 | 49 | 56 | 56 | 44 | 44 | 26 | 27 | 26 | 26 | 26 | 26   | 26  | 53  | 5   | 4   | 1   | 3   | 4   | —   | 1   | 2   | 2   | 1   | 37  | 43  | 43  | 44  | 43  | 28  | 19  | 49  | 44  | 44  |     |
| 29 MAC_MARU216606 | 58 | 58 | 43 | 48 | 48 | 48 | 43 | 45 | 49 | 49 | 57 | 57 | 43 | 44 | 26 | 27 | 26 | 26 | 26 | 26   | 26  | 52  | 4   | 4   | 1   | 2   | 4   | 2   | —   | 1   | 1   | 0   | 38  | 43  | 43  | 44  | 43  | 28  | 19  | 48  | 44  | 44  |     |
| 30 MAC_MARU222688 | 57 | 57 | 44 | 49 | 49 | 49 | 43 | 45 | 49 | 50 | 56 | 56 | 43 | 43 | 25 | 26 | 26 | 25 | 25 | 26   | 26  | 52  | 4   | 4   | 2   | 2   | 4   | 2   | 1   | —   | 1   | 1   | 38  | 43  | 43  | 43  | 43  | 28  | 19  | 48  | 44  | 43  |     |
| 31 MAC_MARU249121 | 58 | 58 | 43 | 48 | 48 | 48 | 43 | 45 | 48 | 49 | 57 | 57 | 43 | 43 | 26 | 27 | 26 | 25 | 26 | 26   | 26  | 52  | 3   | 3   | 3   | 0   | 3   | 3   | 2   | 2   | —   | 1   | 37  | 43  | 43  | 44  | 43  | 28  | 19  | 48  | 44  | 43  |     |
| 32 MAC_Carvalho   | 58 | 58 | 43 | 48 | 48 | 48 | 43 | 45 | 49 | 49 | 57 | 57 | 43 | 44 | 26 | 27 | 26 | 26 | 26 | 26   | 26  | 52  | 4   | 4   | 1   | 2   | 4   | 2   | 0   | 1   | 2   | —   | 38  | 43  | 43  | 44  | 43  | 28  | 19  | 48  | 44  | 44  |     |
| 33 OLI_3229-1     | 47 | 48 | 55 | 53 | 53 | 53 | 49 | 51 | 53 | 53 | 47 | 47 | 50 | 49 | 52 | 53 | 53 | 52 | 52 | 53   | 53  | 19  | 51  | 51  | 51  | 51  | 51  | 51  | 51  | 51  | 51  | —   | 42  | 42  | 43  | 40  | 38  | 39  | 45  | 43  | 43  |     |     |
| 34 PAR_12056      | 17 | 16 | 58 | 59 | 59 | 59 | 53 | 57 | 56 | 57 | 17 | 17 | 55 | 55 | 58 | 58 | 58 | 58 | 58 | 58   | 58  | 48  | 58  | 57  | 57  | 57  | 57  | 57  | 57  | 57  | 57  | 57  | 57  | 57  | 57  | 57  | 57  | 57  | 57  | 57  | 57  | 57  |     |
| 35 PIC_Munchique  | 17 | 17 | 58 | 57 | 57 | 57 | 55 | 55 | 57 | 58 | 20 | 20 | 57 | 56 | 58 | 58 | 58 | 58 | 58 | 58   | 58  | 47  | 58  | 57  | 58  | 58  | 57  | 57  | 58  | 58  | 47  | 18  | —   | 3   | 28  | 42  | 43  | 39  | 35  | 35  |     |     |     |
| 36 PIC            | 19 | 19 | 58 | 58 | 58 | 58 | 57 | 56 | 58 | 58 | 22 | 22 | 58 | 57 | 59 | 59 | 59 | 59 | 59 | 59   | 59  | 48  | 59  | 58  | 58  | 58  | 58  | 58  | 58  | 58  | 49  | 19  | 5   | —   | 29  | 41  | 42  | 39  | 36  | 36  |     |     |     |
| 37 PIR_VAV488     | 17 | 17 | 59 | 58 | 57 | 57 | 55 | 56 | 57 | 57 | 22 | 22 | 56 | 55 | 57 | 58 | 57 | 57 | 57 | 57   | 57  | 46  | 58  | 57  | 58  | 58  | 57  | 58  | 58  | 48  | 20  | 17  | 19  | —   | 43  | 42  | 41  | 37  | 36  |     |     |     |     |
| 38 SAB_SPH114202  | 54 | 55 | 46 | 46 | 46 | 46 | 22 | 42 | 46 | 47 | 54 | 54 | 43 | 43 | 44 | 45 | 44 | 45 | 44 | 44   | 44  | 50  | 43  | 43  | 43  | 43  | 44  | 44  | 43  | 43  | 43  | 50  | 56  | 57  | 58  | 57  | —   | 32  | 47  | 44  | 43  |     |     |
| 39 TAC            | 57 | 57 | 46 | 49 | 49 | 49 | 44 | 45 | 49 | 50 | 55 | 55 | 45 | 46 | 31 | 31 | 31 | 31 | 31 | 31   | 31  | 53  | 32  | 32  | 32  | 32  | 32  | 32  | 33  | 32  | 33  | 53  | 57  | 57  | 58  | 57  | 47  | —   | 49  | 45  | 45  |     |     |
| 40 TAM_W10777     | 57 | 56 | 49 | 34 | 33 | 33 | 45 | 46 | 34 | 35 | 55 | 55 |    |    |    |    |    |    |    |      |     |     |     |     |     |     |     |     |     |     |     |     |     |     |     |     |     |     |     |     |     |     |     |

### Footnote for Supplemental Table

Genbank accession numbers for L amino acid sequences include: ALL (NC\_010249), AMA (NC\_010251), BCN (AY216503, NC\_010255), CHA (EU260464), CPX (NC\_010252), GTO (NC\_005082), JUN (AY216507, AY619640, AY819707, DQ489718, NC\_005080), MAC (AY619644, AY624354, NC\_005079), OLI (NC\_010250), PIC (NC\_006439), PIR (NC\_005897), SAB (NC\_006313), TAC (NC\_004292), TAM (AY924393), and WWA (AY924395).

Genbank accession numbers for Z amino acid sequences include: ALL (NC\_010249), AMA (NC\_010251), BCN (AY216503, NC\_010255), CHA (EU260464), CPX (NC\_010252), GTO (AY562388, AY562389, AY562390, AY562391, AY562392, AY562393, AY586551, AY586552, AY586553, AY586554, AY586555, NC\_005082), JUN (AY216507, AY619640, AY819707, DQ489718, NC\_005080), LAT (AY960333), MAC (AY619644, AY624354, AY960326, AY960327, AY960328, AY960329, AY960330, AY960331, AY960332, NC\_005079), OLI (NC\_010250), PIC (NC\_006439), PIR (AY562384, AY562385, AY562386, AY562387, NC\_005897), SAB (NC\_006313), TAC (NC\_004292), TAM (AY924393), and WWA (AY924395).

Genbank accession numbers for GPC amino acid sequences include: ALL (AY012686, NC\_010253), AMA (NC\_010247), BCN (AF512833, AY924392, NC\_010256), CHA (EU260463), CPX (NC\_010254), CTN (DQ865244, DQ865245), FLE (AF485257, AF512831), GTO (AY497548, NC\_005077), JUN (AY619641, AY746353, D10072, DQ272266, NC\_005081, U70799, U70800), LAT (AF512830), MAC (AY571959, AY619645, AY924202, AY924203, AY924204, AY924205, AY924206, AY924207, AY924208, NC\_005078), OLI (NC\_010248), PAR (AF485261), PIC (AF0181555, NC\_006447), PIR (NC\_005894), SAB (NC\_006317), TAC (NC\_004293), TAM (AF485263), and WWA (AF228063, AF485264).

Genbank accession numbers for NP amino acid sequences include: ALL (AY012686, NC\_010253), AMA (NC\_010247), BCN (AF512833, AY924392, NC\_010256), CHA

(EU260463), CPX (NC\_010254), CTN (DQ865244, DQ865245), FLE (AF485257, AF512831), GTO (AY497548, NC\_005077), JUN (AY619641, AY746353, D10072, DQ272266, NC\_005081), LAT (AF512830), MAC (AY571959, AY619645, AY924202, AY924203, AY924204, AY924205, AY924206, AY924207, AY924208, NC\_005078), OLI (NC\_010248), PAR (AF485261), PIC (AF0181555, NC\_006447), PIR (NC\_005894), SAB (NC\_006317), TAC (NC\_004293), TAM (AF485263), and WWA (AF228063, AF485264).
